# Supplementary material for: Terrestrial Cosmogenic Nuclide depth profiles used to infer changes in Holocene glacier cover, Vintage Peak, Southern Coast Mountains, British Columbia
Source: Copernicus journal article supplement (doi:10.5194/egusphere-2024-2900), 2024-10-08
Supplement: Supplementary file 1 [file egusphere-2024-2900-supplement.zip]

## Sheet: Sheet1
Snow_Course_Name	Number	Elevation_metres	Date_of_Survey	Snow_Depth_cm	Water_Equiv_mm	Density_pecent	Avg snow depth (cm)	Std Dev depth	Avg SWE	Std Dev SWE	Avg density	Density std dev
POWELL RIVER (UPPER)	3A02	1002	1938-03-27	325	1509	46	219.935	101.655	846.561	398.575	38.1626	6.65838
POWELL RIVER (UPPER)	3A02	1002	1939-04-01	NA	NA	NA
POWELL RIVER (UPPER)	3A02	1002	1940-03-30	142	518	36
POWELL RIVER (UPPER)	3A02	1002	1941-03-25	127	467	37
POWELL RIVER (UPPER)	3A02	1002	1942-03-24	246	716	29
POWELL RIVER (UPPER)	3A02	1002	1943-04-01	NA	NA	NA
POWELL RIVER (UPPER)	3A02	1002	1945-03-23	274	721	26
POWELL RIVER (UPPER)	3A02	1002	1946-03-22	348	1306	38
POWELL RIVER (UPPER)	3A02	1002	1948-04-01	NA	NA	NA
POWELL RIVER (UPPER)	3A02	1002	1949-03-23	307	1356	44
POWELL RIVER (UPPER)	3A02	1002	1950-03-22	345	1138	33
POWELL RIVER (UPPER)	3A02	1002	1951-03-22	348	1293	37
POWELL RIVER (UPPER)	3A02	1002	1952-03-22	317	1252	39
POWELL RIVER (UPPER)	3A02	1002	1953-03-22	328	1097	33
POWELL RIVER (UPPER)	3A02	1002	1955-04-01	NA	NA	NA
POWELL RIVER (UPPER)	3A02	1002	1956-04-01	NA	NA	NA
POWELL RIVER (UPPER)	3A02	1002	1957-04-01	NA	NA	NA
POWELL RIVER (UPPER)	3A02	1002	1958-04-01	NA	NA	NA
POWELL RIVER (UPPER)	3A02	1002	1959-04-01	NA	NA	NA
POWELL RIVER (UPPER)	3A02	1002	1960-04-01	NA	NA	NA
POWELL RIVER (UPPER)	3A02	1002	1962-03-31	NA	NA	NA
POWELL RIVER (UPPER)	3A02	1002	1963-03-26	157	579	37
POWELL RIVER (UPPER)	3A02	1002	1964-03-26	384	1372	36
POWELL RIVER (UPPER)	3A02	1002	1965-03-22	269	1046	39
POWELL RIVER (UPPER)	3A02	1002	1967-04-01	NA	NA	NA
POWELL RIVER (UPPER)	3A02	1002	1969-03-25	335	1275	38
POWELL RIVER (UPPER)	3A02	1002	1971-03-31	366	1377	38
POWELL RIVER (UPPER)	3A02	1002	1972-03-28	356	1603	45
POWELL RIVER (UPPER)	3A02	1002	1973-03-22	325	1115	34
POWELL RIVER (UPPER)	3A02	1002	1975-03-23	396	1420	36
POWELL RIVER (UPPER)	3A02	1002	1976-04-01	450	1674	37
POWELL RIVER (UPPER)	3A02	1002	1976-04-27	406	1712	42
POWELL RIVER (UPPER)	3A02	1002	1977-03-28	196	549	28
POWELL RIVER (UPPER)	3A02	1002	1977-04-27	127	533	42
POWELL RIVER (UPPER)	3A02	1002	1978-03-22	208	846	41
POWELL RIVER (UPPER)	3A02	1002	1980-03-23	213	688	32
POWELL RIVER (UPPER)	3A02	1002	1984-03-29	210	819	39
POWELL RIVER (UPPER)	3A02	1002	1985-03-28	284	950	33
POWELL RIVER (UPPER)	3A02	1002	1986-04-01	192	756	39
POWELL RIVER (UPPER)	3A02	1002	1987-03-24	236	1097	46
POWELL RIVER (UPPER)	3A02	1002	1988-03-27	324	1242	38
POWELL RIVER (UPPER)	3A02	1002	1989-03-24	265	1034	39
POWELL RIVER (UPPER)	3A02	1002	1990-03-26	244	1030	42
POWELL RIVER (UPPER)	3A02	1002	1990-04-30	144	698	48
POWELL RIVER (UPPER)	3A02	1002	1991-03-26	240	972	41
POWELL RIVER (UPPER)	3A02	1002	1991-05-10	175	816	47
POWELL RIVER (UPPER)	3A02	1002	1992-04-01	153	679	44
POWELL RIVER (UPPER)	3A02	1002	1993-03-26	162	688	42
POWELL RIVER (UPPER)	3A02	1002	1993-05-04	126	580	46
POWELL RIVER (UPPER)	3A02	1002	1994-03-29	249	973	39
POWELL RIVER (UPPER)	3A02	1002	1995-04-01	NA	NA	NA
POWELL RIVER (UPPER)	3A02	1002	1995-04-24	234	1037	44
POWELL RIVER (UPPER)	3A02	1002	1996-03-26	135	511	38
POWELL RIVER (UPPER)	3A02	1002	1997-04-05	311	1296	42
POWELL RIVER (UPPER)	3A02	1002	1998-03-05	245	868	35
POWELL RIVER (UPPER)	3A02	1002	1998-04-07	219	946	43
POWELL RIVER (UPPER)	3A02	1002	1998-05-01	NA	NA	NA
POWELL RIVER (UPPER)	3A02	1002	1999-04-01	458	1813	40
POWELL RIVER (UPPER)	3A02	1002	2000-03-31	291	1158	40
POWELL RIVER (UPPER)	3A02	1002	2001-04-03	214	791	37
POWELL RIVER (UPPER)	3A02	1002	2002-04-02	270	1092	40
POWELL RIVER (UPPER)	3A02	1002	2003-04-01	NA	NA	NA
POWELL RIVER (UPPER)	3A02	1002	2003-04-28	157	673	43
POWELL RIVER (UPPER)	3A02	1002	2004-04-02	261	1160	44
POWELL RIVER (UPPER)	3A02	1002	2005-03-22	70	160	23
POWELL RIVER (UPPER)	3A02	1002	2005-04-01	NA	NA	NA
POWELL RIVER (UPPER)	3A02	1002	2006-04-05	236	948	40
POWELL RIVER (UPPER)	3A02	1002	2007-03-27	327	1320	40
POWELL RIVER (UPPER)	3A02	1002	2008-03-30	323	1205	37
POWELL RIVER (UPPER)	3A02	1002	2009-03-29	275	940	34
POWELL RIVER (UPPER)	3A02	1002	2010-04-25	275	927	34
POWELL RIVER (UPPER)	3A02	1002	2011-04-07	411	1610	39
POWELL RIVER (UPPER)	3A02	1002	2013-03-27	196	888	45
POWELL RIVER (UPPER)	3A02	1002	2014-03-31	203	802	40
POWELL RIVER (UPPER)	3A02	1040	2015-03-31	16	15	9
POWELL RIVER (LOWER)	3A05	882	1939-03-26	203	853	42
POWELL RIVER (LOWER)	3A05	882	1940-03-29	61	218	36
POWELL RIVER (LOWER)	3A05	882	1941-03-25	23	86	37
POWELL RIVER (LOWER)	3A05	882	1942-03-24	170	414	24
POWELL RIVER (LOWER)	3A05	882	1945-03-23	206	503	24
POWELL RIVER (LOWER)	3A05	882	1946-03-22	297	1077	36
POWELL RIVER (LOWER)	3A05	882	1949-03-23	259	1219	47
POWELL RIVER (LOWER)	3A05	882	1950-03-22	290	1006	35
POWELL RIVER (LOWER)	3A05	882	1951-03-22	264	932	35
POWELL RIVER (LOWER)	3A05	882	1952-03-22	257	1036	40
POWELL RIVER (LOWER)	3A05	882	1953-01-22	142	437	31
POWELL RIVER (LOWER)	3A05	882	1953-03-22	246	886	36
POWELL RIVER (LOWER)	3A05	882	1955-03-23	269	904	34
POWELL RIVER (LOWER)	3A05	882	1960-03-22	193	622	32
POWELL RIVER (LOWER)	3A05	882	1963-03-26	66	241	37
POWELL RIVER (LOWER)	3A05	882	1964-03-26	320	1085	34
POWELL RIVER (LOWER)	3A05	882	1965-03-22	193	785	41
POWELL RIVER (LOWER)	3A05	882	1967-03-30	409	1466	36
POWELL RIVER (LOWER)	3A05	882	1969-03-25	295	1102	37
POWELL RIVER (LOWER)	3A05	882	1971-03-31	317	1194	38
POWELL RIVER (LOWER)	3A05	882	1972-03-28	312	1349	43
POWELL RIVER (LOWER)	3A05	882	1973-03-22	257	866	34
POWELL RIVER (LOWER)	3A05	882	1975-03-23	340	1102	32
POWELL RIVER (LOWER)	3A05	882	1976-04-01	361	1359	38
POWELL RIVER (LOWER)	3A05	882	1977-03-28	127	358	28
POWELL RIVER (LOWER)	3A05	882	1978-03-22	114	465	41
POWELL RIVER (LOWER)	3A05	882	1980-03-23	134	396	30
POWELL RIVER (LOWER)	3A05	882	1984-03-29	125	500	40
POWELL RIVER (LOWER)	3A05	882	1985-03-28	201	756	38
POWELL RIVER (LOWER)	3A05	882	1986-04-01	83	343	41
POWELL RIVER (LOWER)	3A05	882	1987-03-24	149	668	45
POWELL RIVER (LOWER)	3A05	882	1988-03-27	245	894	36
POWELL RIVER (LOWER)	3A05	882	1989-02-06	170	620	36
POWELL RIVER (LOWER)	3A05	882	1989-03-24	185	737	40
POWELL RIVER (LOWER)	3A05	882	1990-03-26	178	801	45
POWELL RIVER (LOWER)	3A05	882	1990-04-30	86	426	50
POWELL RIVER (LOWER)	3A05	882	1991-03-26	166	667	40
POWELL RIVER (LOWER)	3A05	882	1991-05-10	76	378	50
POWELL RIVER (LOWER)	3A05	882	1992-04-01	22	105	48
POWELL RIVER (LOWER)	3A05	882	1993-03-26	98	424	43
POWELL RIVER (LOWER)	3A05	882	1993-05-04	38	183	48
POWELL RIVER (LOWER)	3A05	882	1994-03-29	143	604	42
POWELL RIVER (LOWER)	3A05	882	1995-04-24	124	585	47
POWELL RIVER (LOWER)	3A05	882	1996-03-26	22	85	39
POWELL RIVER (LOWER)	3A05	882	1997-04-05	234	992	42
POWELL RIVER (LOWER)	3A05	882	1998-03-05	151	588	39
POWELL RIVER (LOWER)	3A05	882	1998-04-07	110	477	43
POWELL RIVER (LOWER)	3A05	882	1999-04-01	379	1554	41
POWELL RIVER (LOWER)	3A05	882	2000-03-31	220	972	44
POWELL RIVER (LOWER)	3A05	882	2001-04-03	138	508	37
POWELL RIVER (LOWER)	3A05	882	2002-04-02	207	844	41
POWELL RIVER (LOWER)	3A05	882	2003-04-28	44	181	41
POWELL RIVER (LOWER)	3A05	882	2004-04-02	162	721	45
POWELL RIVER (LOWER)	3A05	882	2005-03-22	26	50	19
POWELL RIVER (LOWER)	3A05	882	2006-04-05	162	649	40
POWELL RIVER (LOWER)	3A05	882	2007-03-27	237	997	42
POWELL RIVER (LOWER)	3A05	882	2008-03-30	254	1025	40
POWELL RIVER (LOWER)	3A05	882	2009-03-29	213	815	38
POWELL RIVER (LOWER)	3A05	882	2010-04-25	121	371	31
POWELL RIVER (LOWER)	3A05	882	2011-04-07	311	1257	40
POWELL RIVER (LOWER)	3A05	882	2013-03-27	268	1138	42
POWELL RIVER (LOWER)	3A05	882	2014-03-31	145	587	40
POWELL RIVER (LOWER)	3A05	910	2015-03-31	8	8	10
